# Supplementary material for: Morals at the Margins: A Qualitative Case Study Exploring Ethical Tensions Experienced as a Result of Policy Constraints in Two Canadian Primary Care Practices
Source: Research Square preprint supplement (doi:10.21203/rs.3.rs-7320090/v1), 2025-09-11
Supplement: Supplementary file 1 [file 5629b3256906d34a65d4eee6.docx]

**Moral distress in critical and primary care providers from the COVID-19 pandemic: A cross-provincial case study**

**Interview Guide: Family Medicine Administrators/Managers**

Thank you for agreeing to participate in this study. As you know, the purpose of this study is to understand the effects of moral distress and injury on interprofessional teams working in critical care and family medicine environments in Ontario and Alberta. To do this, I will ask you some open-ended questions and you are welcome to answer any way you like. I will let you know when we start recording. As you answer, I will be taking notes of things you mention that I may want to probe further. There are no right or wrong answer and you are free to refuse to answer any questions that you don’t feel comfortable with. You decide how much you want to share. I would also like to remind you that everything that is said during this interview must be kept confidential. The transcripts of this interview will be de-identified for confidentiality purposes. Please also know that you can take a break, or stop the interview at any time.

Do you have any questions before we begin?

I am now going to start recording and begin the interview.

General Questions

1. Generally, how have you felt about your work during the pandemic?
2. Can you tell me about one of the most frustrating days you’ve had at work during the pandemic?
   1. Overall, what has been the most frustrating aspect(s) of your job during the pandemic?
3. Can you tell me about one of the best days you’ve had at work during the pandemic?
   1. Overall, what has been the most rewarding aspect(s) of your job during the pandemic?

Situational Questions

1. Can you tell me about a time during the pandemic where you had to make a hard decision? Maybe you had to weigh a few different options before making the decision, or all the factors were “good”, but one outweighed the other? If you have a few examples you want to talk about that’s okay too.
   1. What did that look like?
   2. How did it feel to make these decisions? Can you walk me through how that felt for you?
   3. How were these decisions made before the pandemic?
      1. After the pandemic (or currently)?
2. Can you tell me about a time where you were unable to care for a patient, or do your work in the way that you wanted to do during the pandemic?
   1. What did that look like?
   2. How did it *feel* to not be able to care for your patient the way you wanted to?
   3. How did you usually care for your patient before the pandemic?
      1. How has this changed after the pandemic (or currently)?
3. Can you tell me about a time where you were unsure of how to care for a patient, or do your work in a way that made sense during the pandemic?
   1. What did that look like?
   2. How did this uncertainty feel when caring for your patient?
4. Can you tell me about a time where the hospital policy, or public health policy, conflicted with what you thought was best for you or your patients?
   1. Which policies were those?
   2. When were these policies enacted?
5. Can you tell me about a time where you couldn’t help a colleague in a way that you wanted to, or would be meaningful?

Questions Regarding Changes in the Practice:

1. What differences in your unit have you noticed since the pandemic began?
   1. With your colleagues? (e.g., Staff shortages, changes in attitude/morale)
   2. With how you feel about your work?
   3. Can you tell me more about…?
2. What metrics in your practice have changed during the pandemic? If you could give us specific numbers, that would be great.
   1. Patient roster?
   2. Appointment frequencies?
   3. Appointment codes or descriptors?
   4. In-person, phone, and/or virtual appointments?
   5. Staffing and schedule changes?
   6. Any other metrics that you believe are important to highlight?
3. Do you have any copies of different emails that were sent out to communicate policy changes, or any other documents that highlight how your practice has had to adapt during the pandemic?
4. Can you tell me about a time where a new policy, guideline, or strategy related to COVID-19 was implemented on your unit that caused a lot of change on the unit? This could include how the clinicians practiced, or morale on the unit, as examples.
5. When it comes to all of the different policies and guidelines that have been implemented by your unit, are there:
   1. policies and guidelines that you have appreciated?
      1. What did you appreciate about them?
   2. policies and guidelines that you have not appreciated?
      1. What did you not appreciate about them?
   3. lessons you have learned for future pandemics, or potential disasters?

Closing Questions

1. What do you wish the general public knew or understood about your work during the pandemic?
2. What do you wish had been done differently on your unit throughout the pandemic?
3. What was it like for you to take part in this study?
4. What are you hoping will come from this research?
5. Is there anything else that we maybe didn’t discuss today that you would like to discuss?
